# Supplementary material for: Branched chain α-ketoacids aerobically activate HIF1α signaling in vascular cells
Source: PubMed Central journal article supplement — bioRxiv. 2024 May 30:2024.05.29.595538. Preprint. [Version 1] doi: 10.1101/2024.05.29.595538 (PMC11160772; doi:10.1101/2024.05.29.595538), 2024-05-30
Supplement: media-1.pdf [file media-1.pdf]

May 29, 2024

## Extended Data Figures and Supplementary Tables

### **Branched chain $\alpha$ -ketoacids aerobically activate HIF1 $\alpha$ signaling in vascular cells**

Wusheng Xiao<sup>1,2,3,4</sup>, Nishith Shrimali<sup>1</sup>, William M. Oldham<sup>1</sup>, Clary B. Clish<sup>5</sup>, Huamei He<sup>1</sup>,  
Samantha J. Wong<sup>6</sup>, Bradley M. Wertheim<sup>1</sup>, Elena Arons<sup>1</sup>, Marcia C. Haigis<sup>6</sup>, Jane A.  
Leopold<sup>1</sup>, and Joseph Loscalzo<sup>1\*</sup>

Divisions of Cardiovascular Medicine<sup>1</sup> and Pulmonary and Critical Care Medicine<sup>1</sup>,  
Department of Medicine, Brigham and Women's Hospital and Harvard Medical School, Boston,  
MA 02115, USA; <sup>2</sup>Department of Toxicology, <sup>3</sup>Beijing Key Laboratory of Toxicological  
Research and Risk Assessment for Food Safety, and <sup>4</sup>Key Laboratory of State Administration  
of Traditional Chinese Medicine for Compatibility Toxicology, School of Public Health, Peking  
University, Beijing 100191, China; <sup>5</sup>Broad Institute of Massachusetts Institute of Technology  
and Harvard University, Cambridge, MA 02142, USA; <sup>6</sup>Department of Cell Biology, Blavatnik  
Institute, Harvard Medical School, Boston, MA 02115, USA

\*Corresponding author:

Joseph Loscalzo, M.D., Ph.D.

Department of Medicine

Brigham and Women's Hospital

75 Francis St, Boston, MA 02115, USA

617-732-5127; 617-732-6439 (fax)

[jloscalzo@bwh.harvard.edu](mailto:jloscalzo@bwh.harvard.edu)

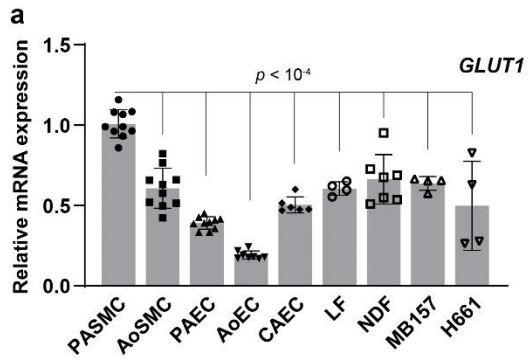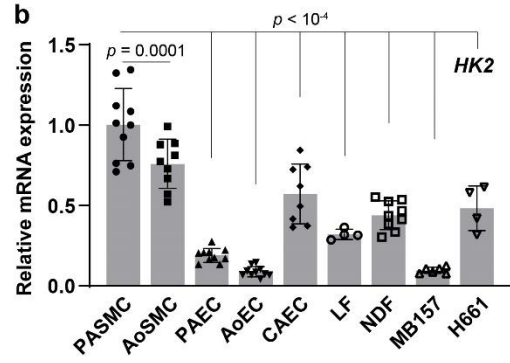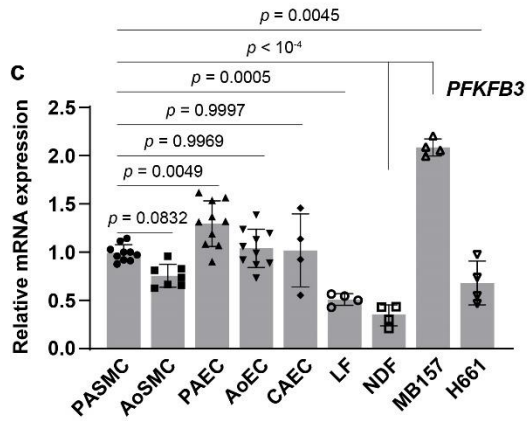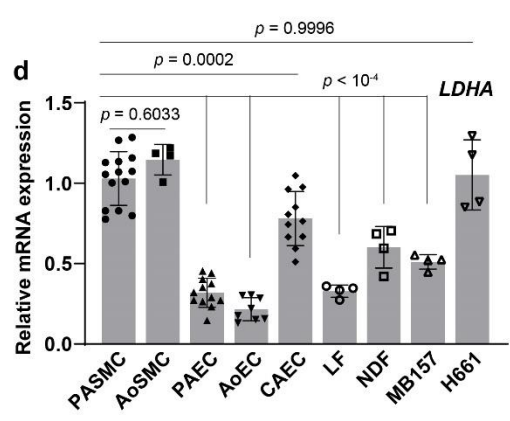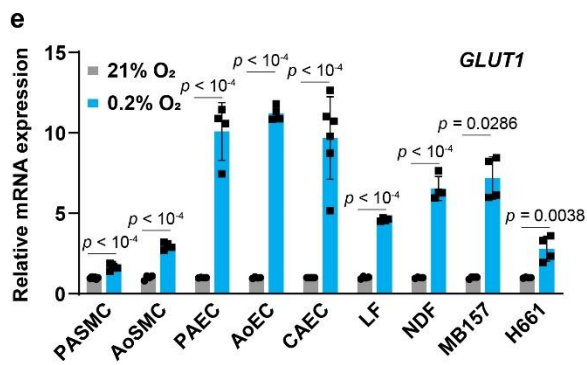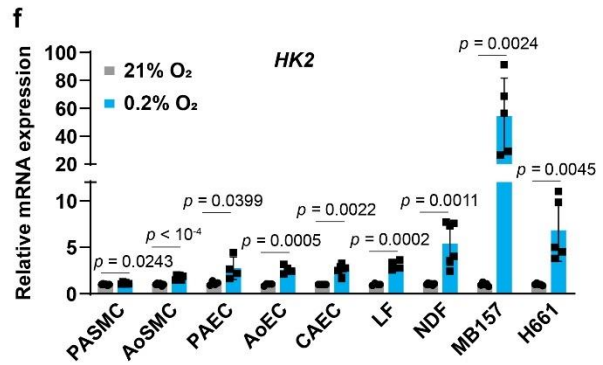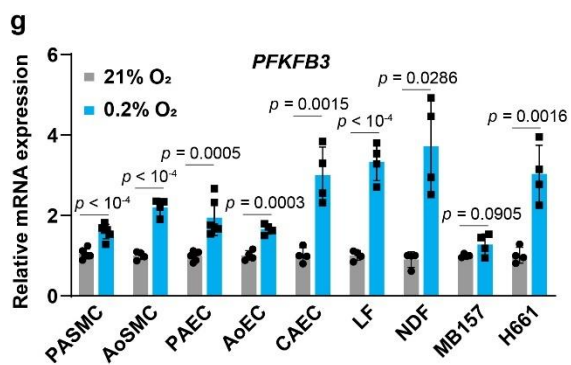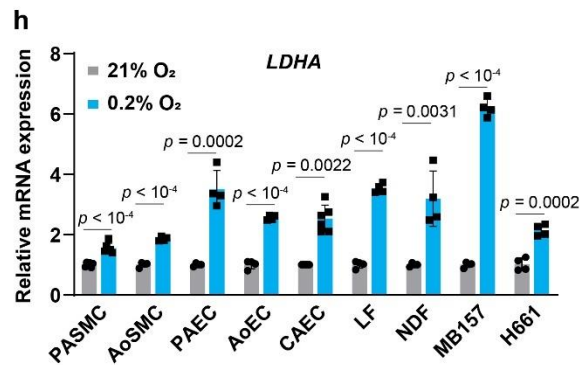

**Extended Data Fig.1 VSMCs exhibit high abundance of key glycolysis regulatory genes and are resistant to hypoxia-induced upregulation of these genes.**

**a-d**, Basal mRNA expression of glycolytic genes *GLUT1* (**a**), *HK2* (**b**), *PFKFB3* (**c**), and *LDHA* (**d**) in 9 different cell types under aerobic conditions. Fold change was calculated relative to PSMCs.  $n = 4-14$ .

**e-h**, mRNA expression of glycolytic genes in 9 different cell types cultured under normoxia (21% O<sub>2</sub>) or hypoxia (0.2% O<sub>2</sub>). Fold change was calculated relative to the corresponding type of cells grown under aerobic condition.  $n = 4-6$ .

One-way ANOVA followed by Dunnett's post-hoc test (**a-d**), Student's t test or Mann-Whitney U test (**e-h**) was applied when compared to untreated PSMCs (**a-d**) or normoxic cultures of the matched cell type (**e-h**).

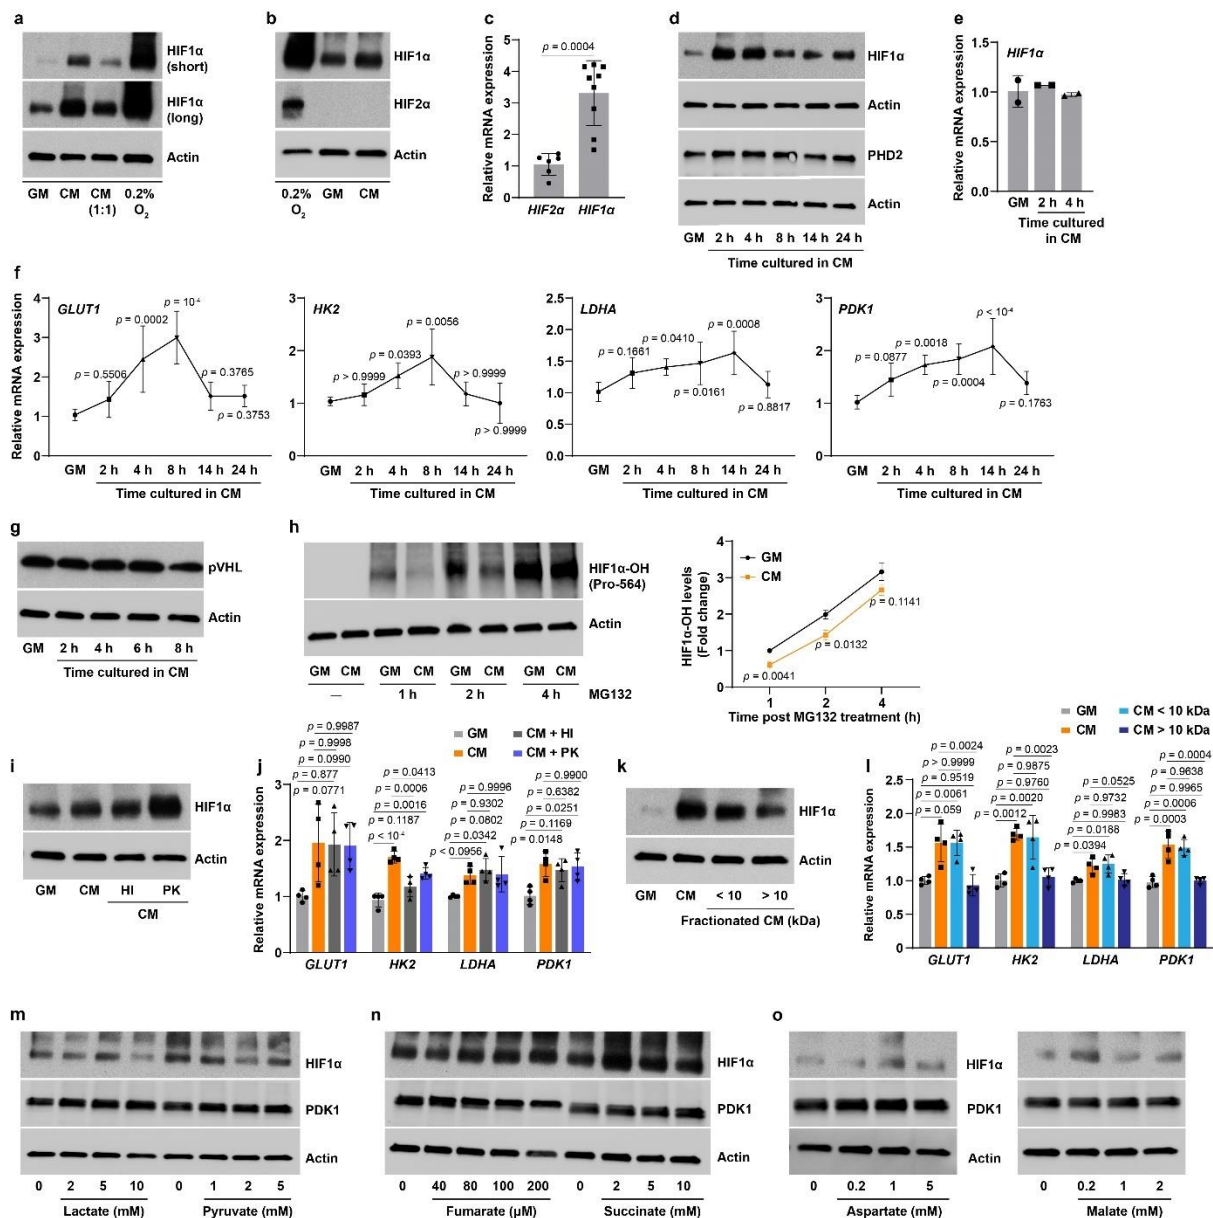

## Extended Data Fig. 2 Medium conditioned from PSMCs induces aerobic activation of HIF1α signaling.

**a**, HIF1α protein expression in PSMCs cultured in growth medium (GM), conditioned medium (CM), or 1:1 (v/v) mix of CM and GM (CM 1:1). Cells grown under 0.2% O<sub>2</sub> were used as positive controls. Short (20 min) and long (60 min) represent film exposure duration.

**b**, HIF1α and HIF2α protein levels in cells cultured in GM, CM, or 0.2% O<sub>2</sub>.

**c**, *HIF1α* and *HIF2α* mRNA abundance in PSMCs cultured in GM. Fold change was calculated relative to HIF2α.  $n = 6-9$ .

**d**, HIF1α and PHD2 protein levels in PSMCs cultured in CM for 2-24 hours.

**e**, *HIF1α* mRNA expression in cells cultured in CM for 2 and 4 hours. Fold change was calculated relative to PSMCs grown in GM.  $n = 2$ .

**f**, mRNA expression of HIF1 $\alpha$  target genes in glucose metabolism in PASMCS when cultured in CM for various time points. Fold change was calculated relative to cells in GM.  $n = 6$ .

**g**, von-Hippel Lindau protein (pVHL) levels in cells cultured in CM for different times.

**h**, Representative immunoblots and quantitation of hydroxylated HIF1 $\alpha$  protein (HIF1 $\alpha$ -OH Pro-564) levels in GM- or CM-cultured PASMCS after addition of proteasomal inhibitor MG132 (20  $\mu$ M) for 1-4 hours. Fold change was calculated relative to GM-cultured PASMCS at 1 hour of MG132 incubation.  $n = 3$ .

**i,j** HIF1 $\alpha$  protein levels (**i**) and mRNA expression of its transcriptional targets (**j**) in GM, CM, and heat inactivation (HI) or proteinase K (PK) treated CM cultured PASMCS. Fold change in **j** was calculated relative to GM-cultured cells.  $n = 4$  (**j**).

**k,l** HIF1 $\alpha$  protein levels (**k**) and mRNA expression of its transcriptional targets (**l**) in GM, CM, and fractionated CM (larger than 10 kDa fraction, >10 and less than 10 kDa fraction, < 10) cultured PASMCS. Fold change in **l** was calculated relative to GM-cultured cells.  $n = 4$  (**l**).

**m-o**, HIF1 $\alpha$  and its target PDK1 protein levels in PASMCS treated with lactate or pyruvate (**m**), fumarate or succinate (**n**), aspartate or malate (**o**) as indicated doses.

Mann-Whitney U test (**c**), Student t test (**h**), or one-way ANOVA followed by Tukey's post-hoc test or Kruskal-Wallis test followed by Dunn's test (**f**, **j**, **l**) was applied when compared to HIF2 $\alpha$  in PASMCS (**c**), to GM-cultured PASMCS with time-matched MG132 treatment (**h**) or no treatment (**f**, **j**, **l**) or to CM-cultured PASMCS (**j**, **l**).

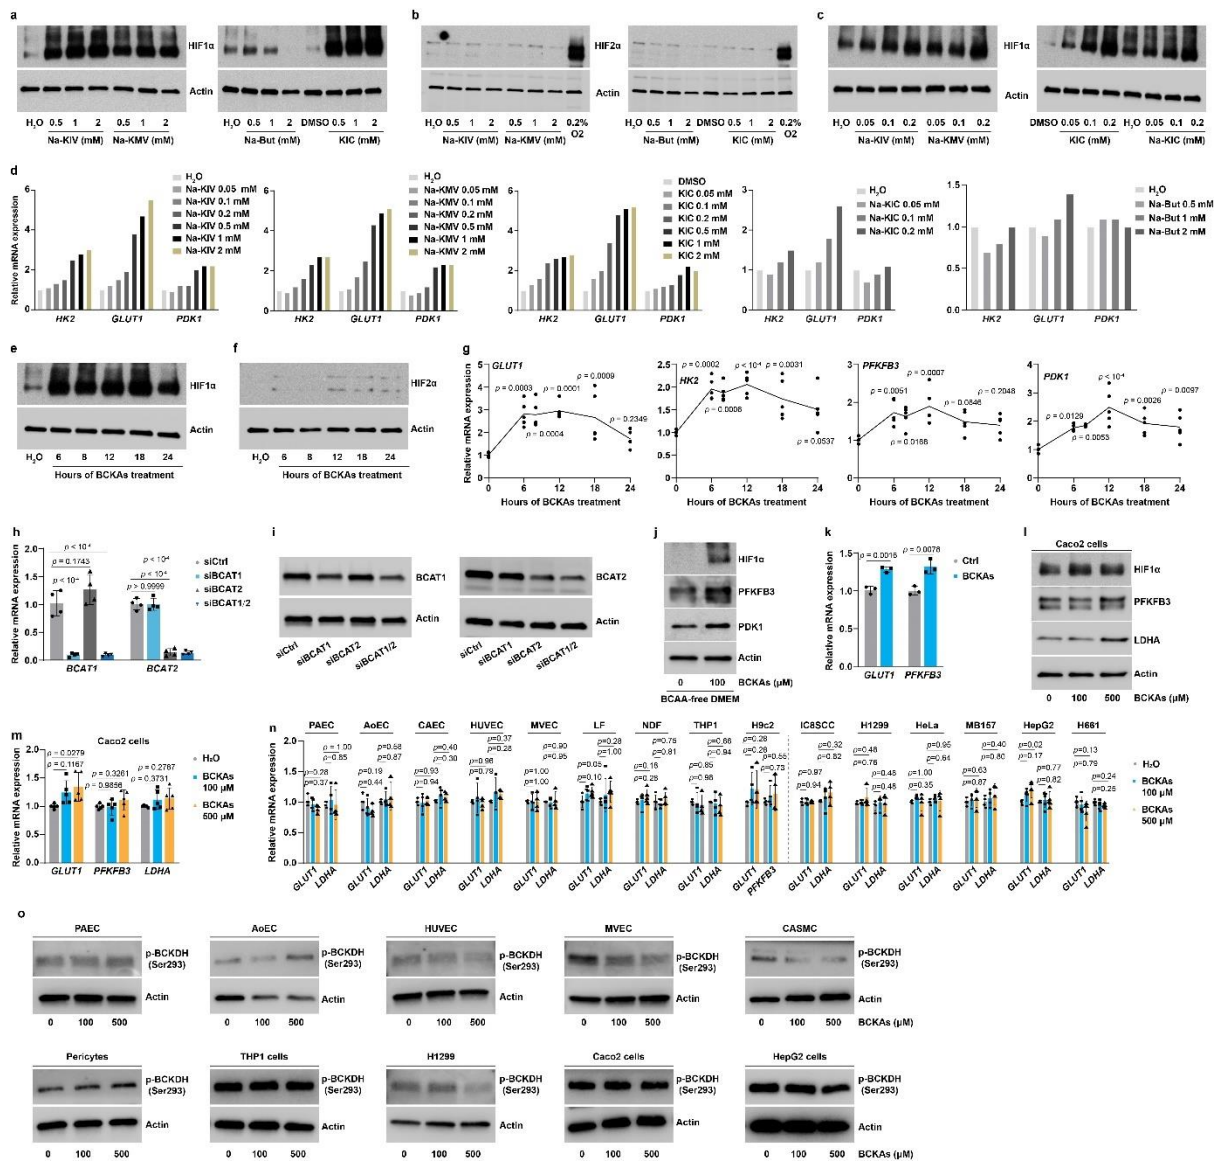

**Extended Data Fig.3 BCKAs are the mediators of paracrine activation of HIF1α signaling under aerobic conditions.**

**a-c**, HIF1α (**a**, **c**) and HIF2α (**b**) proteins in PASMCs treated with 0.05-2 mM of sodium salts of KIV (Na-KIV), KMV (Na-KMV), butyrate (Na-But), KIC (Na-KIC), or acid form of KIC (KIC; DMSO as vehicle control) for 8 hours. Hypoxia (0.2% O<sub>2</sub>) induced HIF2α protein stabilization was included for comparison.

**d**, mRNA expression of three HIF1α target genes in glucose metabolism in PASMCs stimulated with 0.05-2 mM of Na-KIV, Na-KMV, Na-KIC, KIC, and Na-But for 8 hours. Fold change was calculated relative to vehicle control (H<sub>2</sub>O or DMSO) treated cells. *n* = 1.

**e-g**, HIF1α (**e**) and HIF2α (**f**) protein levels and the mRNA expression of HIF1α target genes in glucose metabolism (**g**) in PASMCs stimulated with BCKAs (100 μM Na-KIC, 50 μM of each Na-KIV and Na-KMV) for different time points. Fold change in **g** was calculated relative to untreated control cells at 8-hour time point. *n* = 5 (**g**).

**h,i**, mRNA (**h**) and protein (**i**) expression of BCAT1 and BCAT2 in PSMCs transfected with siRNAs for control (siCtrl), *BCAT1* (siBCAT1), *BCAT2* (siBCAT2), or both (siBCAT1/2). Fold change in **h** was relative to siCtrl-transfected cells.  $n = 4$  (**h**).

**j,k**, Protein levels of HIF1 $\alpha$ , PFKFB3, and PDK1 (**j**) and mRNA expression of *GLUT1* and *PFKFB3* (**k**) in PSMCs cultured in BCAA-free DMEM in the presence or absence of BCKAs for 8 hours. Fold change in **k** was calculated relative to untreated control cells.  $n = 3$  (**k**).

**l,m**, HIF1 $\alpha$ , PFKFB3, and LDHA protein levels (**l**) and the mRNA expression of HIF1 $\alpha$  regulatory genes in glycolysis (**m**) of human colorectal adenocarcinoma Caco2 cells treated with BCKAs. Fold change in (**m**) was relative to vehicle control treated cells.  $n = 5$  (**m**).

**n**, mRNA expression of *GLUT1*, *LDHA*, or *PFKFB3* in normal and cancerous cells after stimulation with different doses of BCKAs. Fold change was calculated relative to their own untreated control cells. Dotted line separates normal vs. malignant cell types.  $n = 4-5$ .

**o**, Phosphorylated BCKDH (p-BCKDH) protein levels in 10 different types of cells with BCKA treatment.

One-way ANOVA followed by Dunnett's post-hoc test (**g, h, m, n**) or Student's t test (**k**) was applied when compared to untreated control PSMCs (**g**), siCtrl-transfected PSMCs (**h**), BCAA-free DMEM-cultured control PSMCs (**k**), untreated Caco2 cells (**m**), or the corresponding untreated cells (**n**).

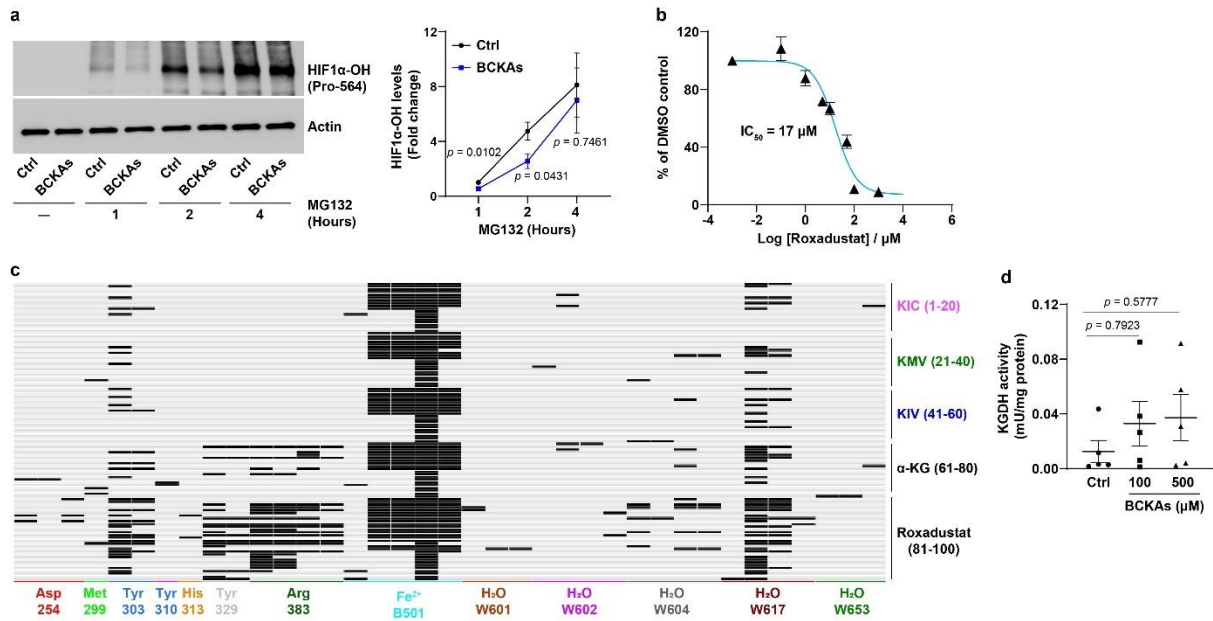

#### Extended Data Fig. 4 Effects of BCKAs on PHD2 and KGDH activity.

**a**, PASCs were treated with BCKAs (100 μM of KIC, 50 μM of each KIV and KMV) or vehicle control for 8 hours followed by addition of proteasomal inhibitor MG132 (20 μM) for 1-4 hours. Hydroxylated HIF1α (HIF1α-OH Pro-564) protein levels were measured and quantitated. Fold change was calculated relative to untreated cells with MG132 incubation for 1 hour.  $n = 3$ .

**b**, Inhibition curve and  $IC_{50}$  value of roxadustat for PHD2 hydroxylase activity.  $n = 4$ .

**c**, Protein-ligand interaction fingerprint (PLIF) prediction of 20 potential binding configurations of each BCKA with the PHD2 active site. α-KG and roxadustat, two known ligands of PHD2 enzyme, were included for comparison.

**d**, KGDH activity in PASCs treated with BCKAs.  $n = 5$ .

Student's t test (**a**) or Kruskal-Wallis test followed by Dunn's post-hoc test (**d**) was applied when compared to untreated PASCs at time-matched MG132 treatment (**a**) or untreated PASCs (**d**).



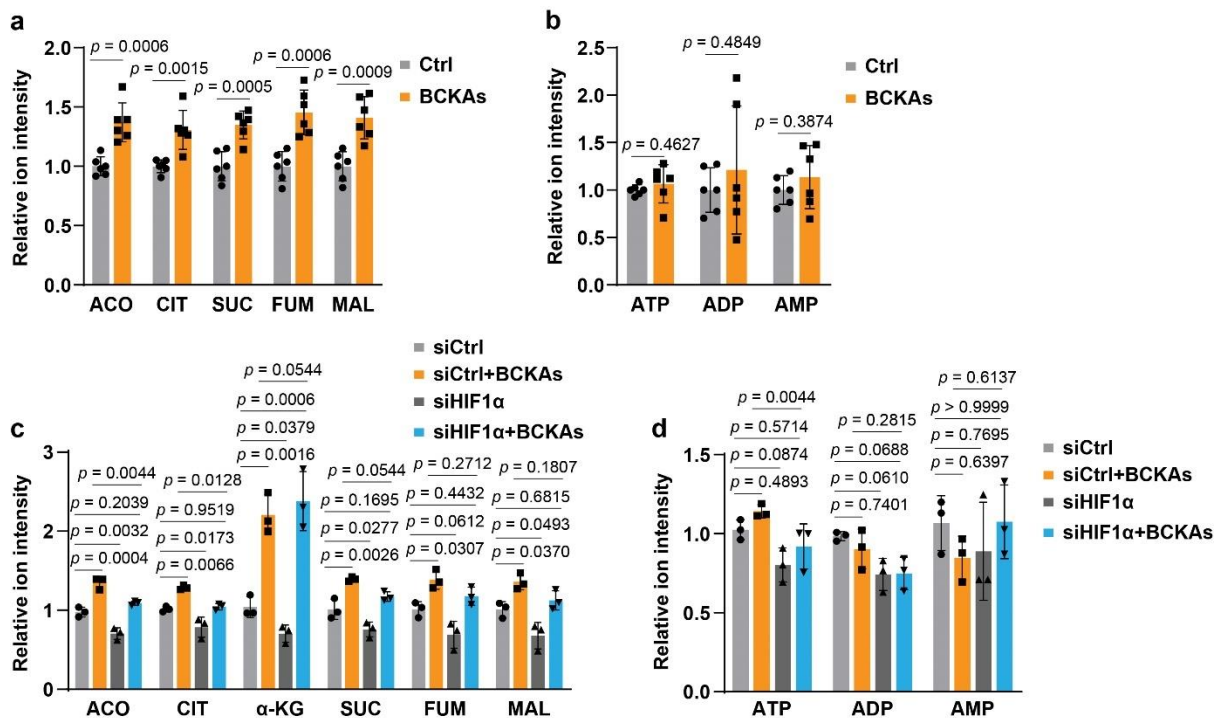

**Extended Data Fig. 5 The influence of BCKAs on mitochondrial respiration and its dependence on HIF1 $\alpha$  activity in PSMCs.**

**a,b,** LC-MS measurements of intermediary metabolites aconitate (ACO), citrate (CIT), succinate (SUC), fumarate (FUM), and malate (MAL) of the TCA cycle (**a**), and of ATP and its derivatives (**b**) in PSMCs in the presence or absence of BCKAs. Fold change was calculated relative to control cells.  $n = 6$ .

**c,d,** PSMCs were transfected with human *HIF1 $\alpha$*  siRNA (siHIF1 $\alpha$ ) or control siRNA (siCtrl) followed by treatment with BCKAs. LC-MS was used to measure the TCA cycle metabolites (**c**), and ATP and its metabolites (**d**). Fold change was calculated relative to siCtrl-transfected and untreated cells.  $n = 3$ .

Student's t test (**a, b**) or one-way ANOVA followed by Tukey's post-hoc test (**c, d**) was applied when compared to control PSMCs (**a, b**), or siCtrl-transfected and control or BCKA-treated cells (**c, d**).

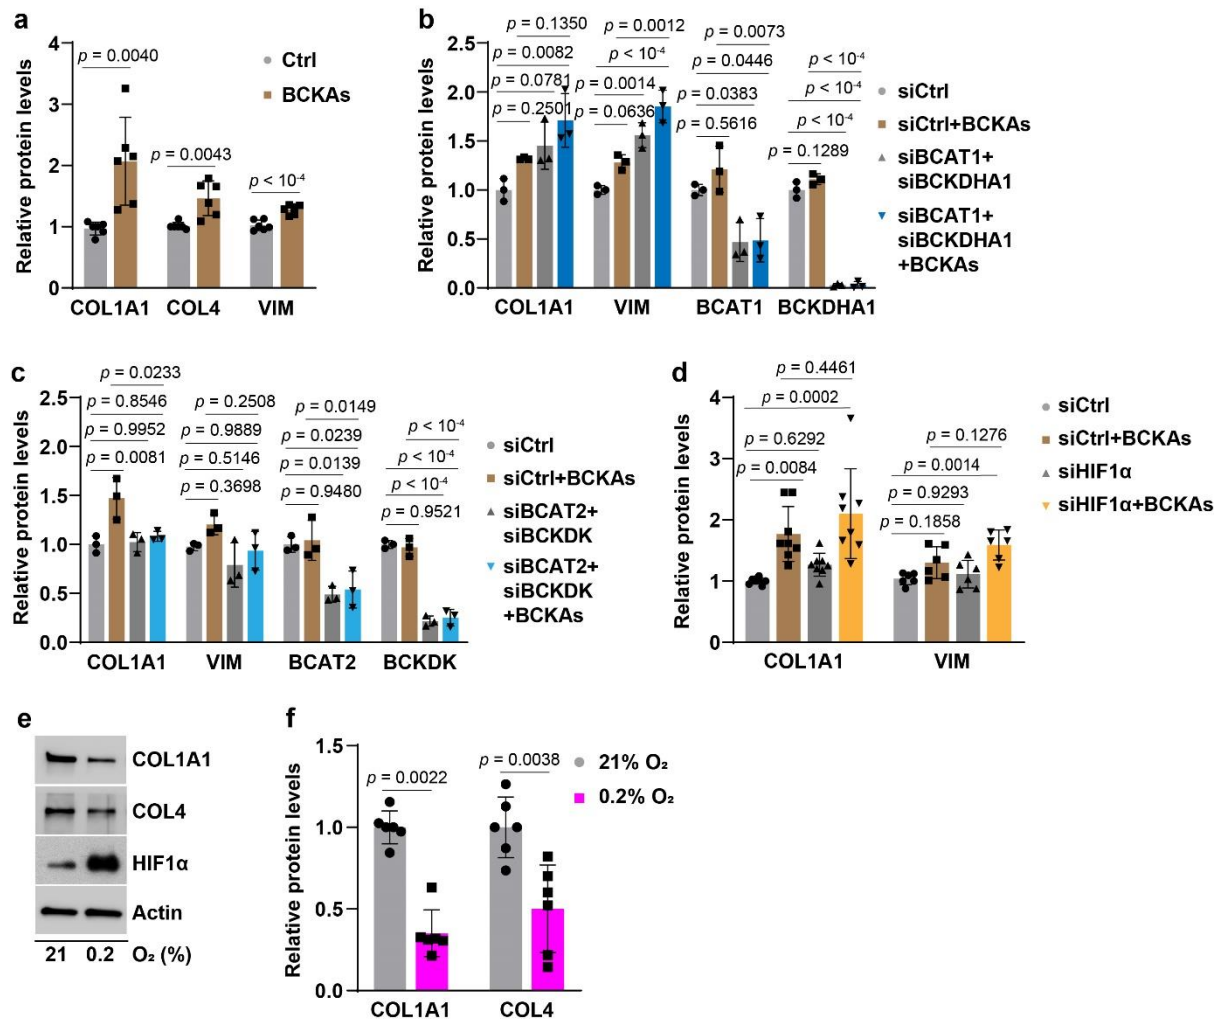

**Extended Data Fig. 6 The levels of synthetic phenotype marker proteins in PSMCs.**

**(a)** Protein levels in PSMCs treated with BCKAs. Fold change was calculated relative to untreated control.  $n = 6$ .

**(b-d)** Protein levels in PSMCs transfected with control siRNA (siCtrl), *BCAT1* and *BCKDHA1* siRNA (siBCAT1+siBCKDHA1; **b**), or *BCAT2* and *BCKDK* siRNA (siBCAT2+siBCKDK; **c**), or *HIF1α* siRNA (siHIF1α; **d**) with or without BCKA treatment. Fold change was calculated relative to siCtrl-transfected and untreated control.  $n = 3$  (**b, c**) and 8 (**d**).

**(e,f)** Representative immunoblots (**e**) and quantitation (**f**) of COL1A1 and COL4 protein levels in PSMCs cultured in 21%  $O_2$  or 0.2%  $O_2$ . HIF1α protein was included as a positive control in hypoxia. Fold change in **f** was relative to normoxic cultures of PSMCs.  $n = 6$ .

Student's t test (COL1A1 and VIM in **a**, COL4 in **f**), Mann-Whitney U test (COL4 in **a**, COL1A1 in **f**), or one-way ANOVA followed by Tukey's post-hoc test (**b-d**) was applied when compared to control PSMCs (**a, f**), or siCtrl-transfected and control or BCKA-treated cells (**b-d**).

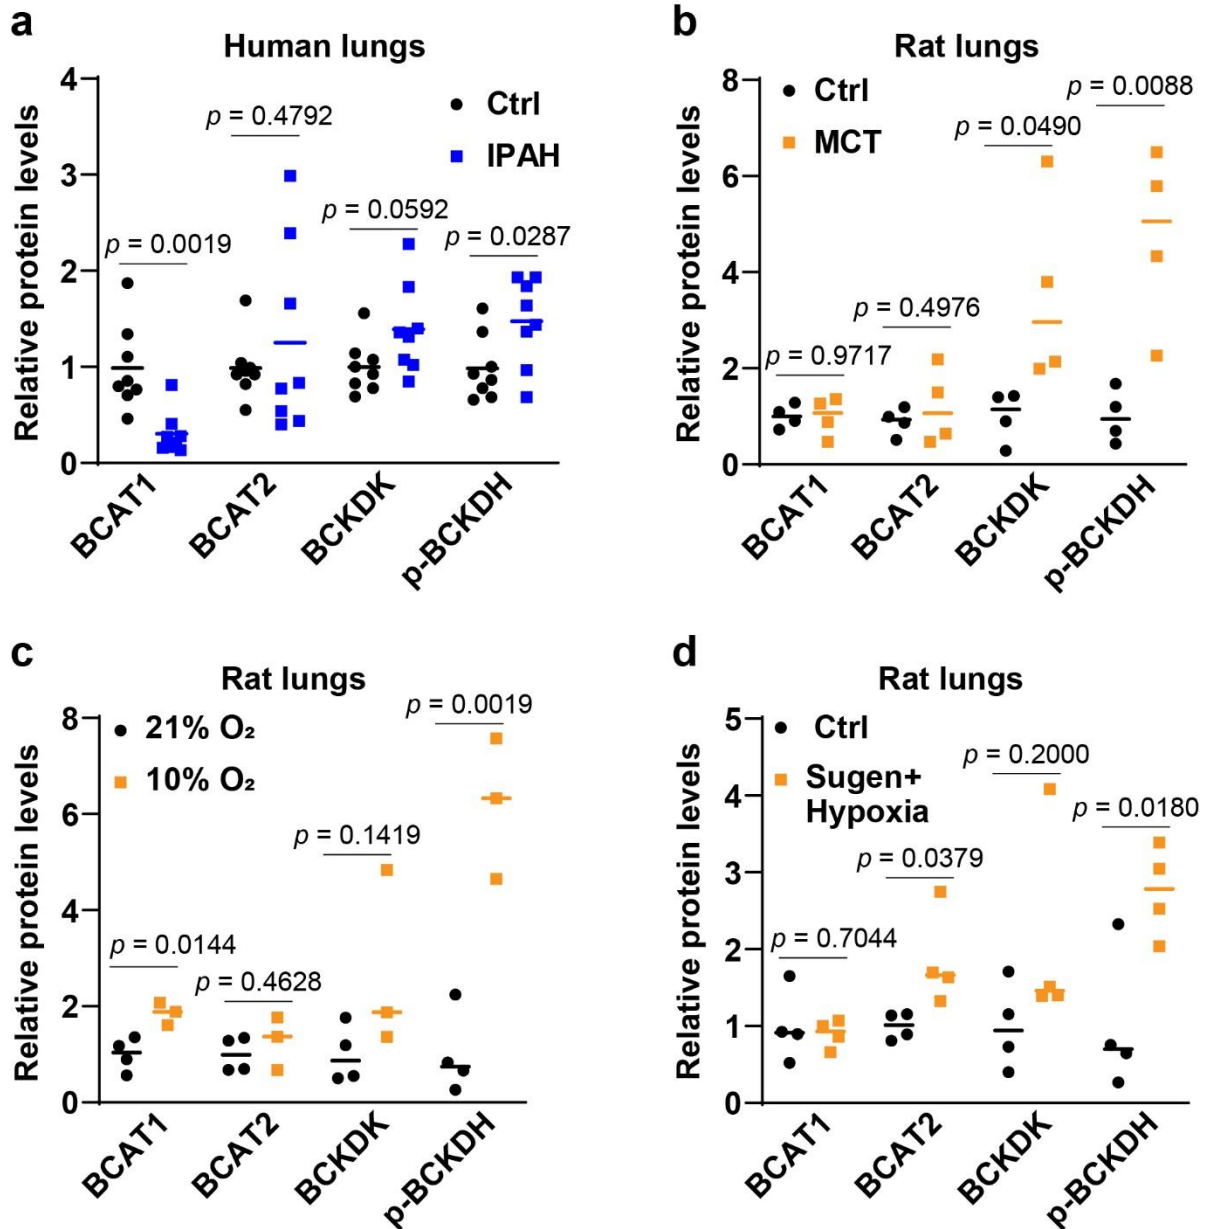

**Extended Data Fig. 7** The levels of key BCKA metabolic proteins in the lungs of PAH patients and rats.

**a**, Quantitation results of BCAT1, BCAT2, BCKDK, and p-BCKDH proteins in the lungs of IPAH patients.  $n = 8$  individuals.

**b-d**, Quantitation results of BCAT1, BCAT2, BCKDK, and p-BCKDH proteins in the lungs of PAH rats treated with MCT (**b**), hypoxia (10% O<sub>2</sub>; **c**), or Sugen5416+hypoxia (**d**).  $n = 3-4$  rats.

Student's t test (**a-d**) or Mann-Whitney U test (BCAT1 in **a** and BCKDK in **d**) was applied when compared to control patients (**a**) or animals (**c-d**).

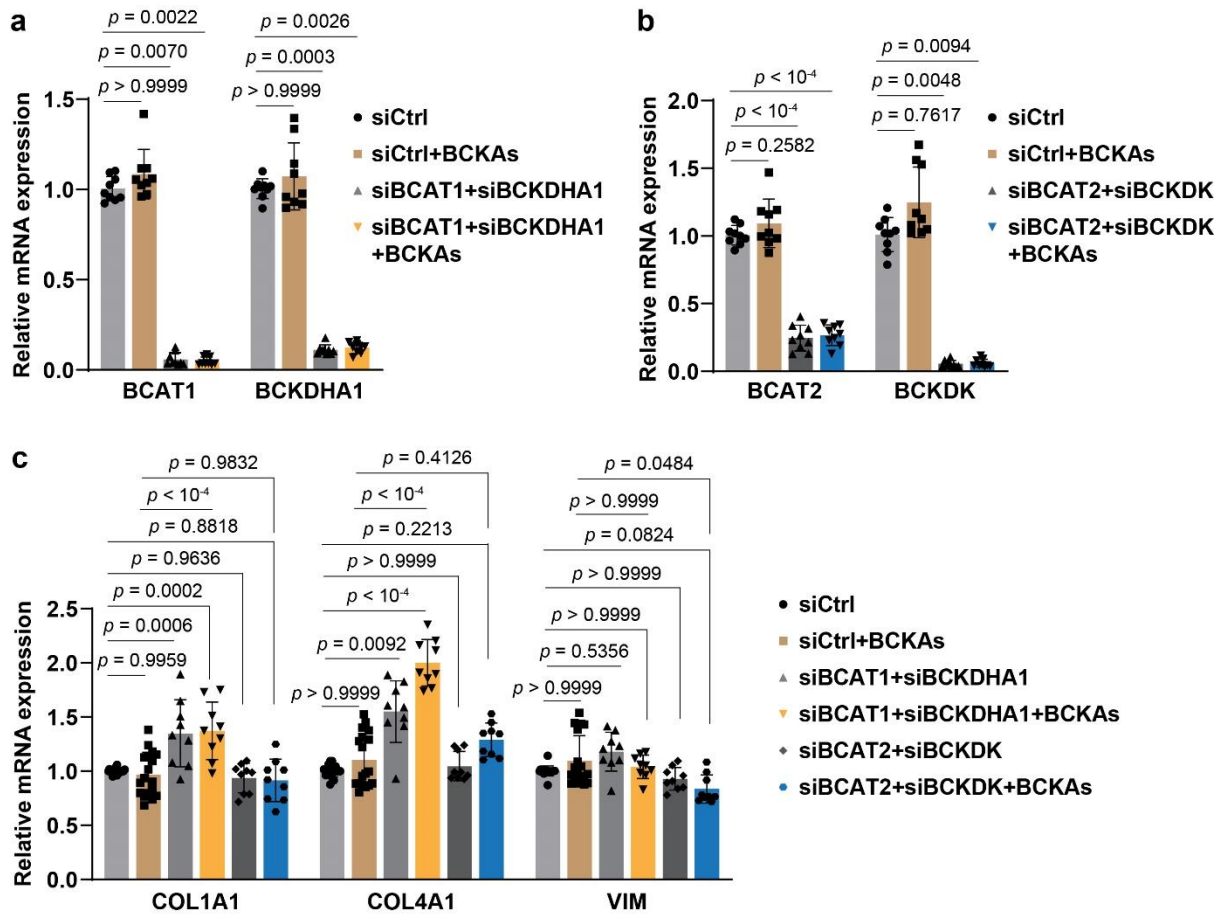

**Extended Data Fig. 8 The expression of synthetic marker genes in IPAH-PASMCs with endogenous and exogenous manipulation of BCKA levels.**

(a) mRNA expression of *BCAT1* and *BCKDHA1* in IPAH-PASMCs transfected with siRNAs for control (siCtrl) or *BCAT1* and *BCKDHA1* (siBCAT1+siBCKDHA1) followed by BCKAs or vehicle control treatment.  $n = 9$  from 3 individuals.

(b) mRNA expression of *BCAT2* and *BCKDK* in IPAH-PASMCs transfected with siCtrl or *BCAT2* and *BCKDK* (siBCAT2+siBCKDK) followed by BCKAs or vehicle control treatment.  $n = 9$  from 3 individuals.

(c) mRNA expression of synthetic marker genes in IPAH-PASMCs transfected and treated as described in panels a and b.  $n = 9-18$  from 3 individuals.

Kruskal-Wallis test followed by Dunn's post-hoc test (a-c) or one-way ANOVA followed by Dunnett's (b) or Tukey's (c) post-hoc test was applied when compared to siCtrl-transfected control cells (a-c) or BCKA-treated cells (c).

**Supplementary Table 1 Clinical and demographic information on human specimen presented in this study**

| <b>Patient ID</b>          | <b>Clinical diagnosis</b> | <b>Gender</b> | <b>Race</b> | <b>Ethnicity</b>   |
|----------------------------|---------------------------|---------------|-------------|--------------------|
| <b>Lung RNA samples</b>    |                           |               |             |                    |
| AH-007                     | FDL                       | M             | White       | Non-Hispanic       |
| AH-009                     | FDL                       | M             | White       | Non-Hispanic       |
| AH-012                     | FDL                       | M             | White       | Non-Hispanic       |
| AH-013                     | FDL                       | F             | White       | Non-Hispanic       |
| BA-033                     | FDL                       | M             | White       | Non-Hispanic       |
| BA-040                     | FDL                       | M             | Unknown     | Hispanic or Latino |
| BA-046                     | FDL                       | F             | Unknown     | Hispanic or Latino |
| BA-055                     | FDL                       | M             | White       | Non-Hispanic       |
| UC-010                     | FDL                       | F             | White       | Non-Hispanic       |
| VA-005                     | FDL                       | M             | White       | Non-Hispanic       |
| BA-017                     | IPAH                      | F             | White       | Non-Hispanic       |
| CC-017                     | IPAH                      | M             | White       | Non-Hispanic       |
| CC-030                     | IPAH                      | F             | White       | Non-Hispanic       |
| ST-004                     | IPAH                      | F             | White       | Non-Hispanic       |
| ST-010                     | IPAH                      | M             | White       | Non-Hispanic       |
| ST-017                     | IPAH                      | M             | White       | Non-Hispanic       |
| ST-019                     | IPAH                      | M             | White       | Hispanic or Latino |
| ST-042                     | IPAH                      | M             | White       | Non-Hispanic       |
| UA-013                     | IPAH                      | M             | Asian       | Non-Hispanic       |
| VA-015                     | IPAH                      | F             | White       | Non-Hispanic       |
| <b>Frozen lung tissues</b> |                           |               |             |                    |
| AH-012                     | FDL                       | M             | White       | Non-Hispanic       |
| AH-013                     | FDL                       | F             | White       | Non-Hispanic       |
| AH-016                     | FDL                       | M             | White       | Non-Hispanic       |
| BA-040                     | FDL                       | M             | Unknown     | Hispanic or Latino |
| BA-043                     | FDL                       | M             | Unknown     | Hispanic or Latino |
| BA-046                     | FDL                       | F             | Unknown     | Hispanic or Latino |
| BA-048                     | FDL                       | M             | White       | Non-Hispanic       |
| BA-049                     | FDL                       | M             | Unknown     | Non-Hispanic       |

| BA-055             | FDL                       | M             | White       | Non-Hispanic       |
|--------------------|---------------------------|---------------|-------------|--------------------|
| BA-062             | FDL                       | M             | Asian       | Unknown            |
| BA-017             | IPAH                      | F             | White       | Non-Hispanic       |
| CC-030             | IPAH                      | F             | White       | Non-Hispanic       |
| ST-028             | IPAH                      | F             | White       | Hispanic or Latino |
| ST-033             | IPAH                      | F             | White       | Non-Hispanic       |
| ST-037             | IPAH                      | F             | Unknown     | Hispanic or Latino |
| ST-042             | IPAH                      | M             | White       | Non-Hispanic       |
| ST-052             | IPAH                      | M             | Asian       | Non-Hispanic       |
| UA-013             | IPAH                      | M             | Asian       | Non-Hispanic       |
| VA-011             | IPAH                      | F             | White       | Non-Hispanic       |
| VA-015             | IPAH                      | F             | White       | Non-Hispanic       |
| <b>Lung slides</b> |                           |               |             |                    |
| BA-049             | FDL                       | M             | Unknown     | Non-Hispanic       |
| BA-062             | FDL                       | M             | Asian       | Unknown            |
| BA-046             | FDL                       | F             | Unknown     | Hispanic or Latino |
| <b>PASMCs</b>      |                           |               |             |                    |
| <b>Patient ID</b>  | <b>Clinical diagnosis</b> | <b>Gender</b> | <b>Race</b> | <b>Age (Y)</b>     |
| CC-013             | IPAH                      | F             | White       | 27                 |
| ST-019             | IPAH                      | M             | White       | 25                 |
| ST-026             | IPAH                      | M             | White       | 40                 |
| UA-013             | IPAH                      | M             | Asian       | 18                 |
| VA-011             | IPAH                      | F             | White       | 32                 |

FDL: failed donor lung; IPAH: Idiopathic pulmonary arterial hypertension

**Supplementary Table 2 Abbreviations and their corresponding full names used**

| <b>Abbreviation</b> | <b>Full name</b>                                      |
|---------------------|-------------------------------------------------------|
| $\alpha$ -KG        | $\alpha$ -ketoglutarate                               |
| ACTA2               | $\alpha$ -smooth muscle actin                         |
| AoSMCs              | aortic smooth muscle cells                            |
| BCAAs               | branched chain amino acids                            |
| BCAT                | branched chain amino acid transaminase                |
| BCKAs               | branched chain $\alpha$ -ketoacids                    |
| BCKDH               | branched chain ketoacid dehydrogenase complex         |
| BCKDK               | branched chain ketoacid dehydrogenase kinase          |
| CASMCs              | coronary artery smooth muscle cells                   |
| COL1A1              | collagen 1A1                                          |
| COL4                | collagen 4                                            |
| ECAR                | extracellular acidification rate                      |
| GLUT1               | glucose transporter 1                                 |
| HK2                 | hexokinase 2                                          |
| HIF1 $\alpha$       | hypoxia-inducible factor 1 $\alpha$                   |
| KGDH                | $\alpha$ -KG dehydrogenase                            |
| KIC                 | $\alpha$ -ketoisocaproate                             |
| KIV                 | $\alpha$ -ketoisovalerate                             |
| KMV                 | $\alpha$ -keto- $\beta$ -methylvalerate               |
| L2HG                | L-2-hydroxyglutarate                                  |
| L2HGDH              | L2HG dehydrogenase                                    |
| LDHA                | lactate dehydrogenase A                               |
| mPAP                | mean pulmonary artery pressure                        |
| OCR                 | oxygen consumption rate                               |
| PAH                 | pulmonary arterial hypertension                       |
| PASMCs              | pulmonary arterial smooth muscle cells                |
| PDK1                | pyruvate dehydrogenase kinase 1                       |
| PFKFB3              | 6-phosphofructo-2-kinase/fructose 2,6-biphosphatase 3 |
| PHD2                | prolyl hydroxylase domain-containing protein 2        |
| PVR                 | pulmonary vascular resistance                         |
| ROS                 | reactive oxygen species                               |
| TCA                 | tricarboxylic acid                                    |
| VIM                 | vimentin                                              |
| VSMCs               | vascular smooth muscle cells                          |
